# Supplementary material
Source: PubMed Central journal article supplement (PMC5290130)
Supplement: NIHMS827044-supplement-1.pdf [file NIHMS827044-supplement-1.pdf]

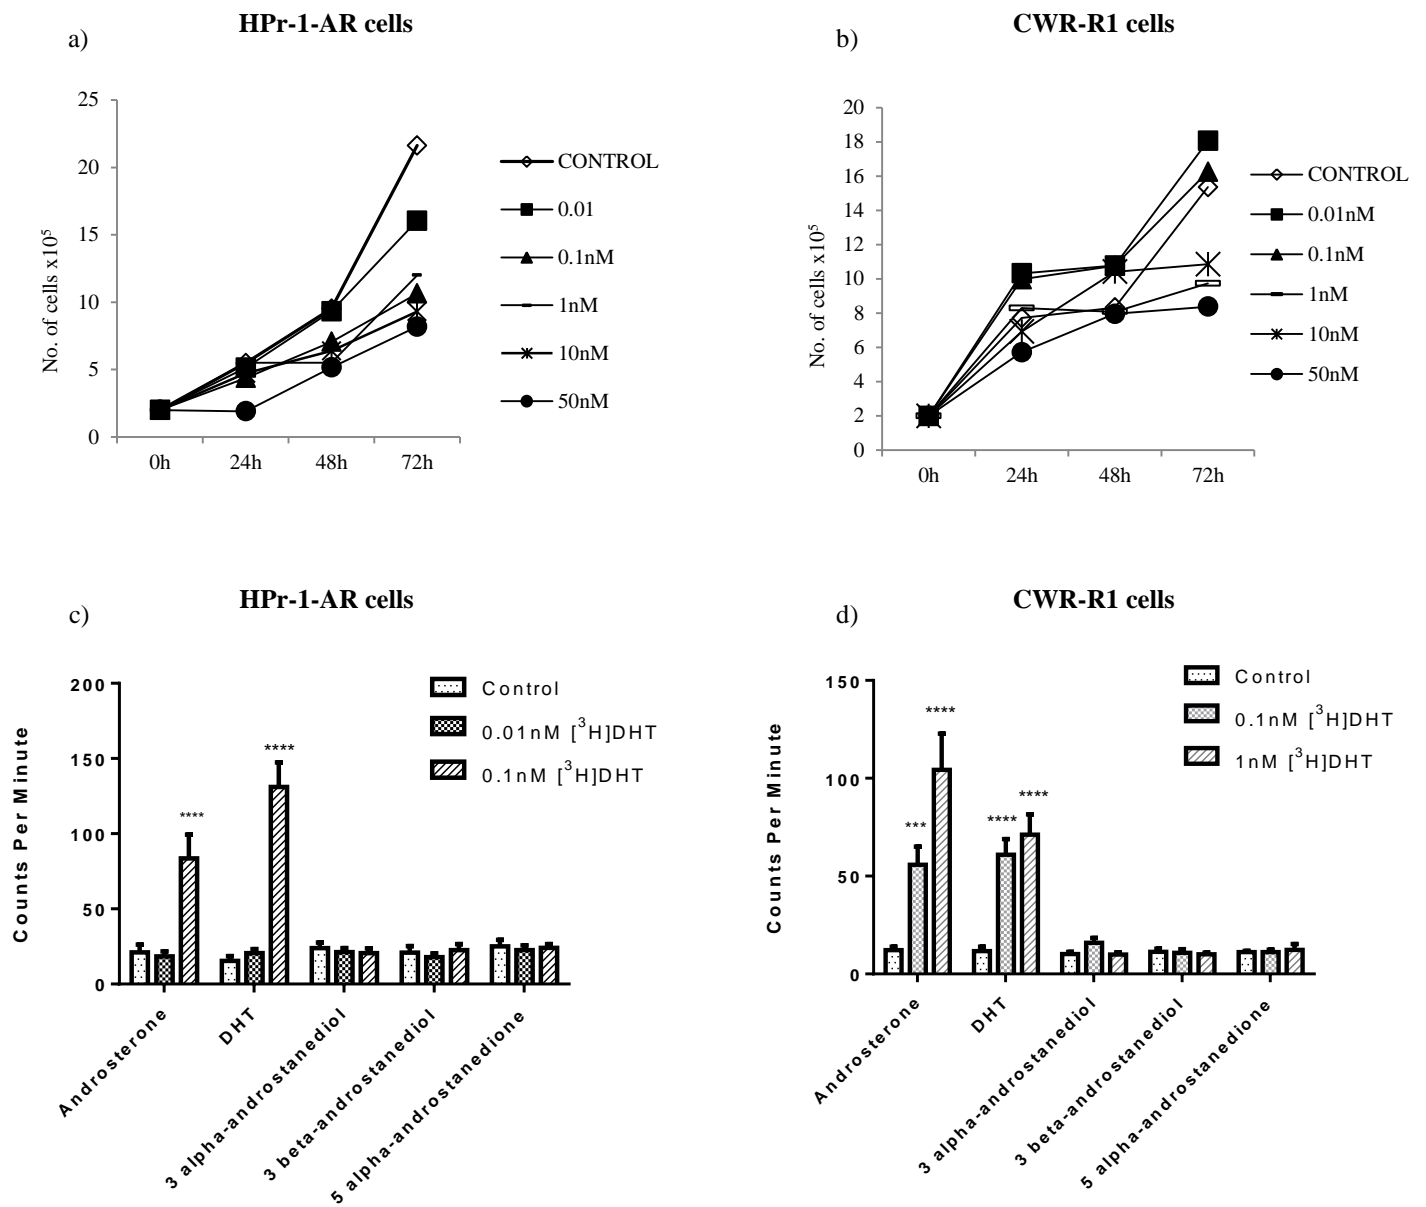

**S Figure 1: Growth Curves and DHT metabolism in the HPr-1-AR and CWR-R1 cells.** (a) HPr-1-AR and (b) CWR-R1 cells were treated with increasing concentrations of DHT for 24, 48 and 72 hours. Cells numbers were measured using the Beckman Coulter ViCell Cell Counter. DHT metabolism was studied in the (c) HPr-1-AR and (d) CWR-R1 cells by incubating cells with increasing concentrations of [<sup>3</sup>H]DHT for 6 hours. Intracellular androgens were extracted using MTBE and analyzed by TLC. All experiments were done three times in triplicates. Statistical analysis was done using the one-way ANOVA test (\*\*\*p<0.001; \*\*\*\*p<0.0001). The means of the treated samples were compared with the mean of the control sample.

a) HEK293 pcDNA3.1ABCG2

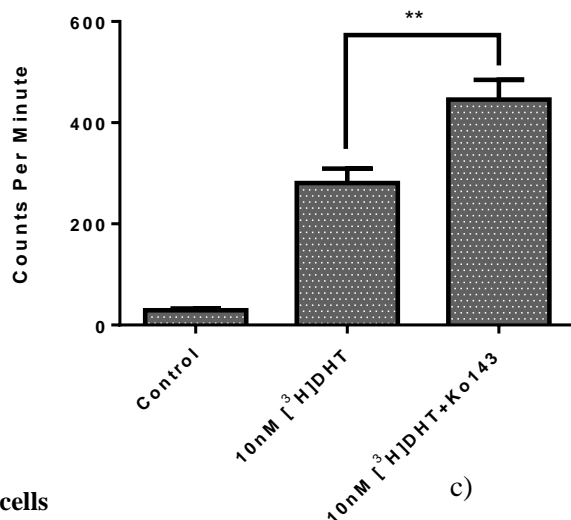

b) HPr-1-AR cells

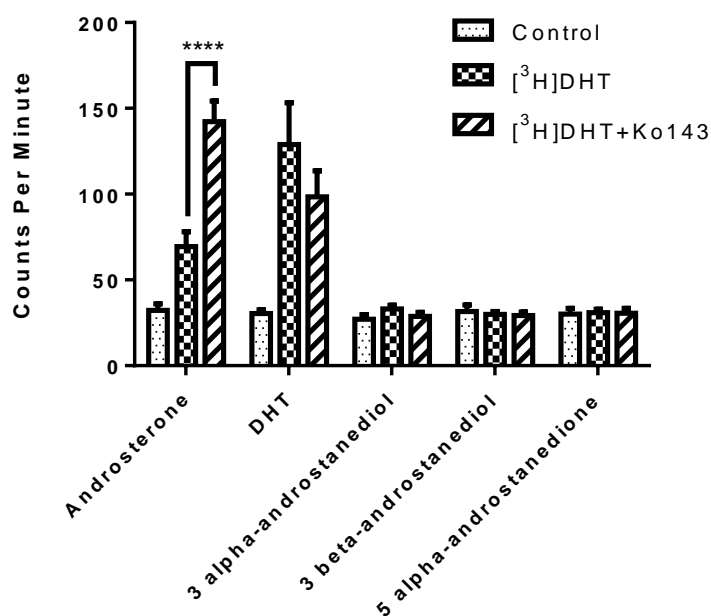

c) CWR-R1 cells

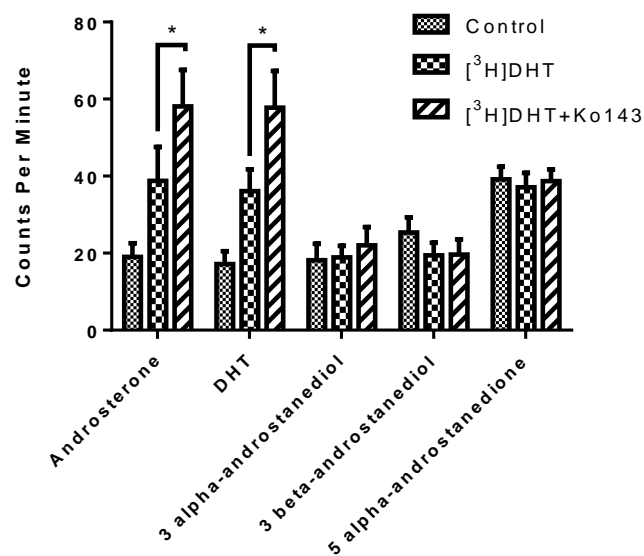

**S Figure 2: ABCG2 effluxes androgens.** (a) HEK293 cells stably transfected with pcDNA3.1ABCG2 and ABCG2-expressing (b) HPr-1-AR and (c) CWR-R1 cells were treated with either vehicle control, [<sup>3</sup>H]DHT or [<sup>3</sup>H]DHT+ 1 $\mu$ M Ko143 for 6h. Intracellular androgens were extracted using MTBE. Extracted androgens were analyzed by Thin Layer Chromatography. Experiments were done three times in triplicates. Statistical analysis was done using the two-way ANOVA test ( $p^* < 0.05$ ;  $**p < 0.01$ ;  $****p < 0.0001$ ).

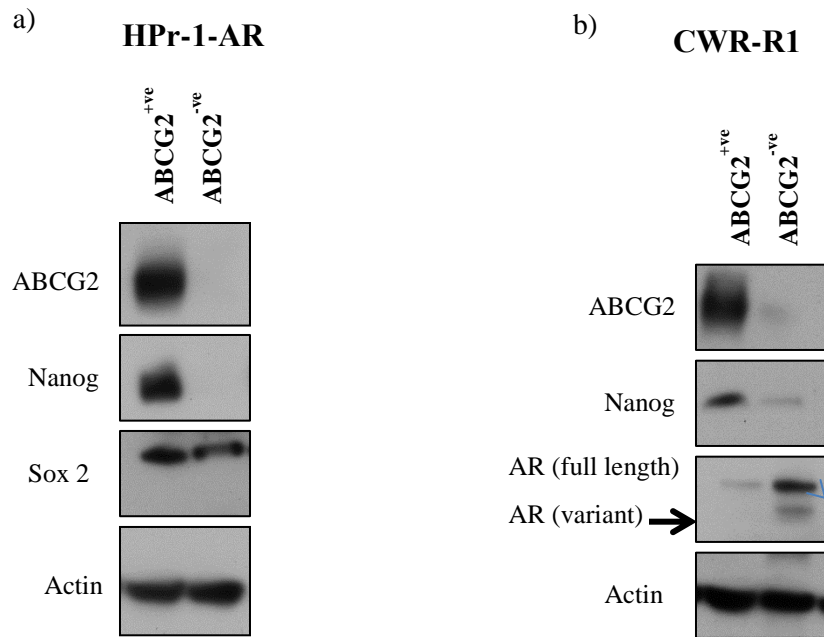

**S Figure 3: ABCG2-expressing cells enrich for stem cell markers.** Cell lysates obtained from ABCG2-expressing (a) HPr-1-AR and (b) CWR-R1 cells were subjected to immunoblot analysis to determine the expression level of stem cell markers.

**Supplementary Table 1: Primer Sequences**

| <b>Gene</b>    | <b>Forward Primer</b>  | <b>Reverse Primer</b>  |
|----------------|------------------------|------------------------|
| <b>NAT1</b>    | TGGTGTCTCCAGGTCAATCA   | CATCTGGTATGAGCGTCCAA   |
| <b>AQP3</b>    | TTGGCTTTGCTGTCACTCTG   | GTAGATGGGCAGCTTGATCC   |
| <b>MME</b>     | CCGAACCTACAAGGAGTCCA   | GCAAATGCTGCTTCCACATA   |
| <b>TIPARP</b>  | CCATCAGAAACCCTCAGTGG   | TCTTGGAAAATGCCTGGAAC   |
| <b>GADD45B</b> | GCCGGCGTCTACGAGTCA     | CCAGCACACAGAAGGTCACATT |
| <b>FKBP5</b>   | AGGCTGCAAGACTGCAGATC   | CTTGCCCATGCTTTATTGG    |
| <b>TMEM37</b>  | TTGTGCGAGGACAAACTC     | ACATTAGGGTGAAGCCGATG   |
| <b>GRHL1</b>   | CCTCTCACAAGCGAATGGAT   | GCAATGGGAAGGACATGAGT   |
| <b>GADD45G</b> | GCCGGCGTCTACGAGTCA     | CCAGCACACAGAAGGTCACATT |
| <b>GAPDH</b>   | GAACATCATCCCTGCCTCTACT | CGCCTGCTTCACCACCTT     |
